# Supplementary material
Source: publisher site journal article supplement (https://www.dovepress.com/article/413358)
Supplement: Supplementary file 1 [file get_supplementary_file.php]

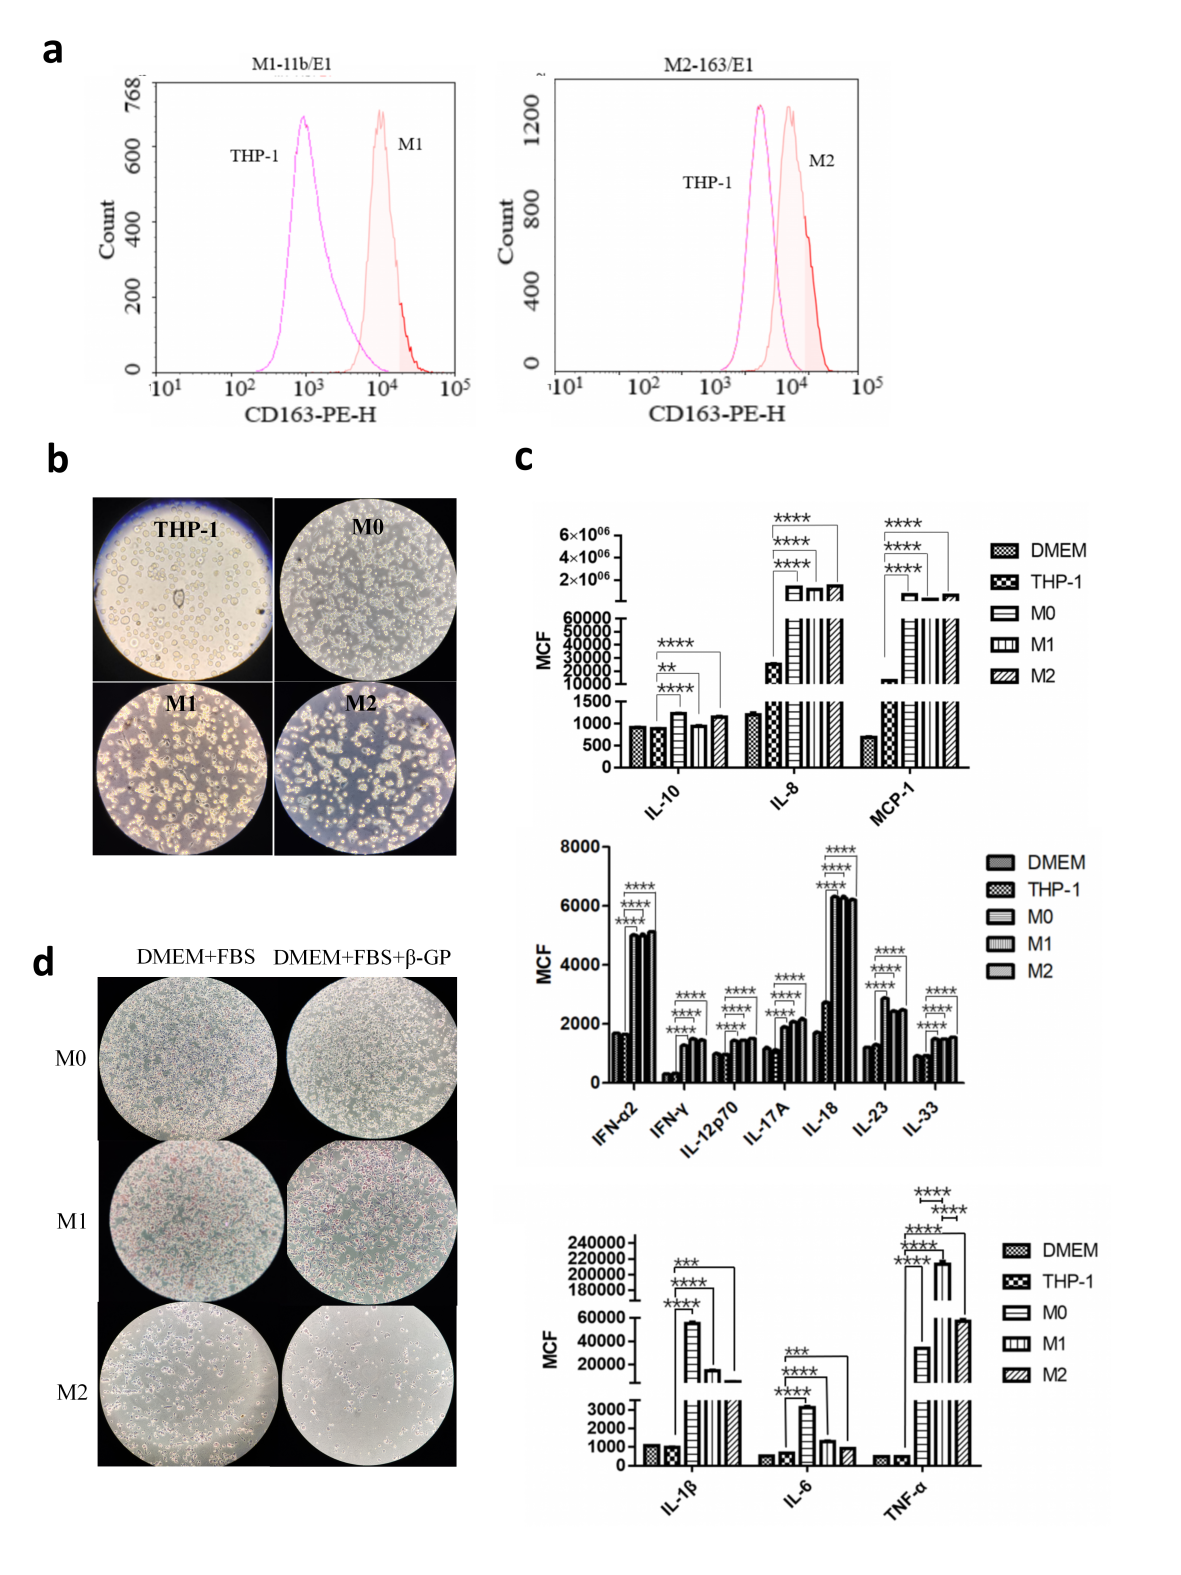
 Supplementary figure 1. Polarization and calcification of macrophage subtypes (ANOVA, ** stands for *p*<0.01, *** stands for *p* <0.001, and **** stands for *p* <0.0001). (a) THP-1 cells were induced to differentiate into M0, M1 and M2 macrophages. Flow cytometry showed significant expression of CD11b in M1 macrophages and CD163 expression in M2 macrophages, indicating successful differentiation of the M1 and M2 subtypes. (b) The cellular morphology of THP-1, M0, M1 and M2 macrophages. (c) Cytokine levels in the culture medium of macrophage subtypes were examined by flow cytometry. (d) Alizarin red staining was used to detect calcification in macrophage subtypes. No significant calcification was observed in macrophage subtypes, and TNF-α levels were highest in the culture medium of M1 macrophages.


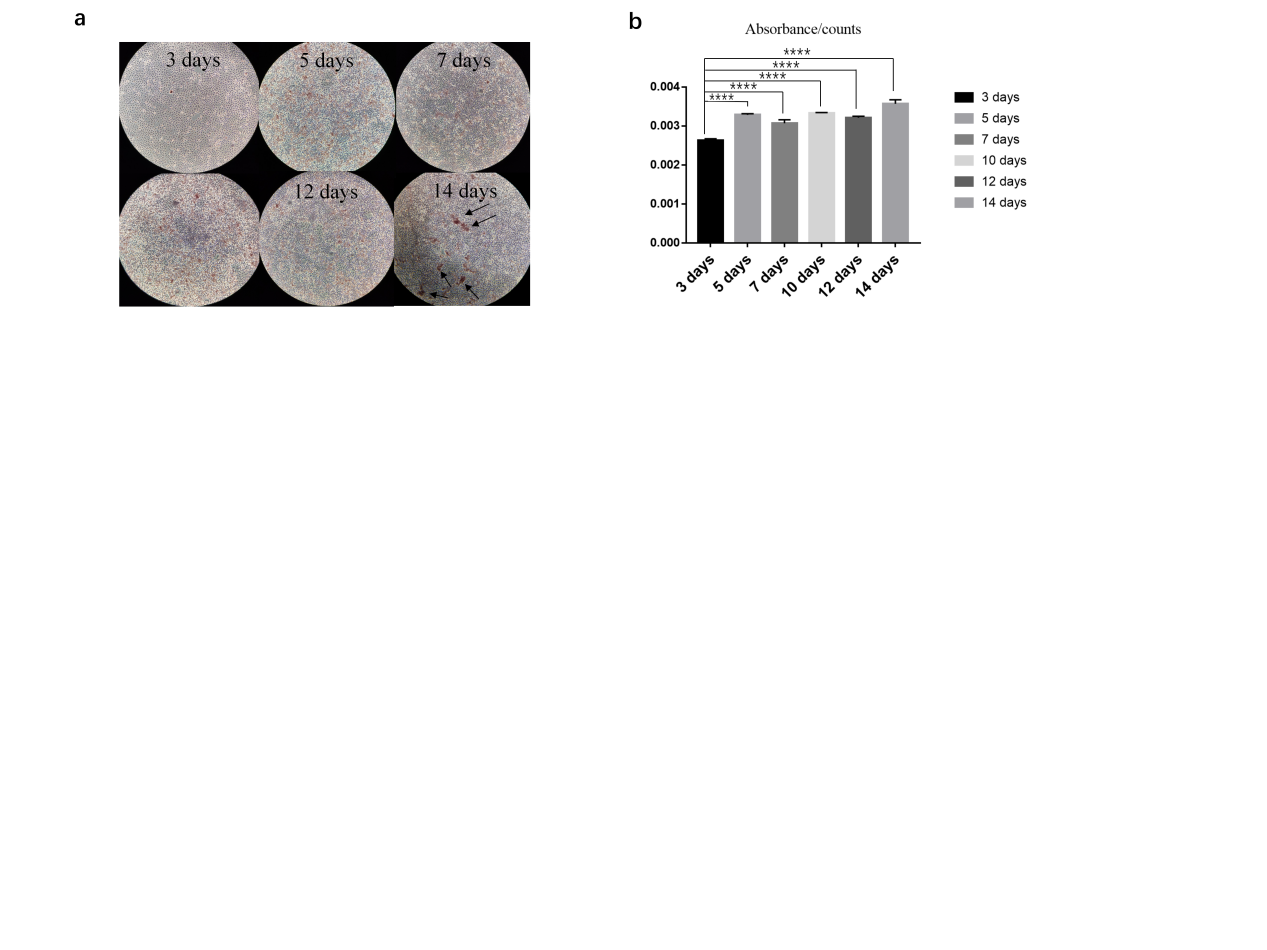


Supplementary figure 2. Calcification in VSMCs following β-GP induction. VSMCs were cultured with β-GP for 14 days to induce calcification (ANOVA, **** stands for *p*<0.0001). (a) Observation of calcification nodules using Alizarin red staining (the location of calcification nodules was marked with black arrows). (b) Quantification of calcification using the cetylpyridinium chloride assay. Calcification was formed in VSMCs following β-GP induction.
